# Supplementary material for: Experimental Study on Different Improvement Schemes of EICP-Lignin Solidified Silt
Source: MDPI journal article supplement (doi:10.3390/ma16030999), 2023-01-21
Supplement: s1 [file s1]

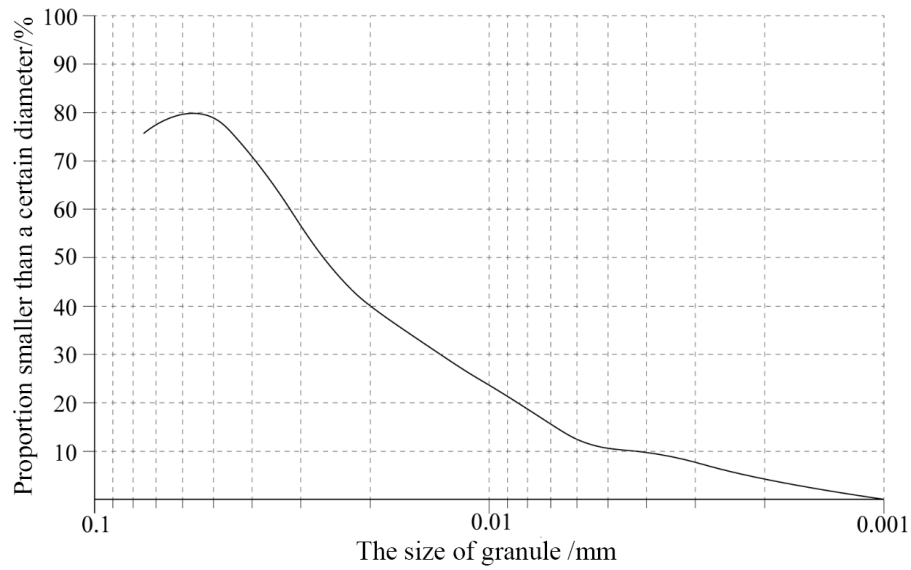

**Figure S1.** Particle size distribution curve.

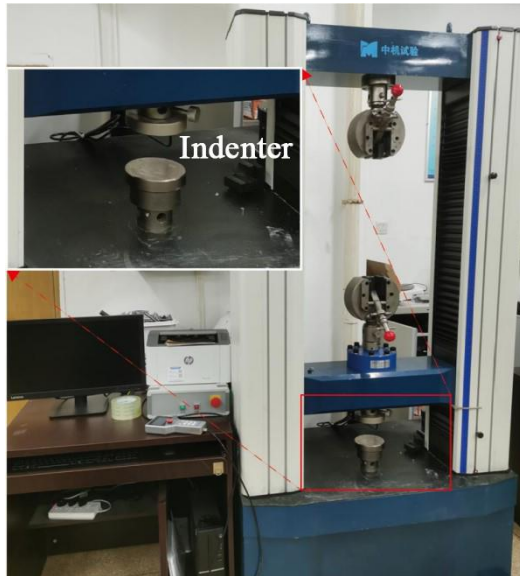

**Figure S2.** Electronic universal material testing machine RGM-100kN.

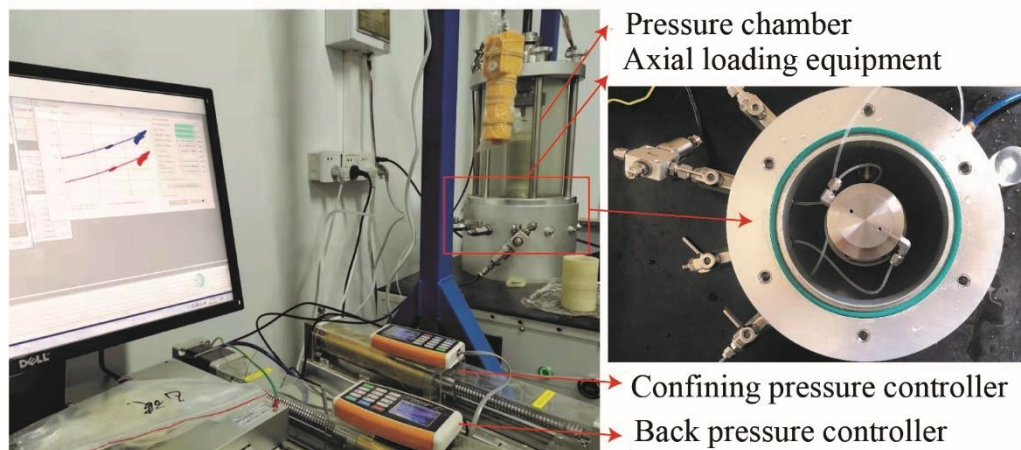

**Figure S3.** KTL dynamic three-axis system.

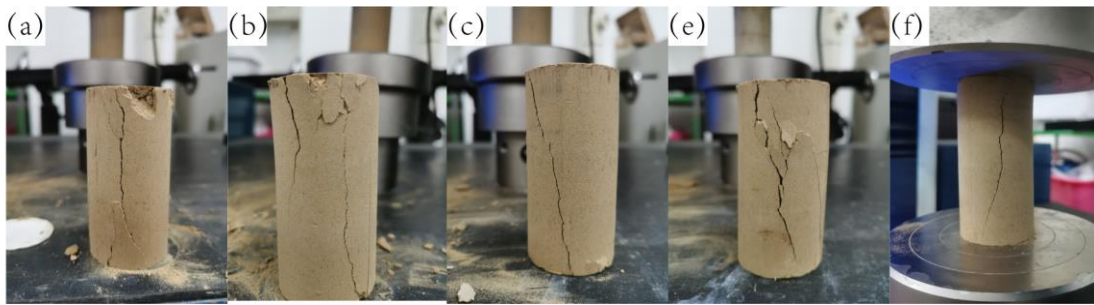

(a) The pressure failure diagram of the constant temperature sample of the scheme E

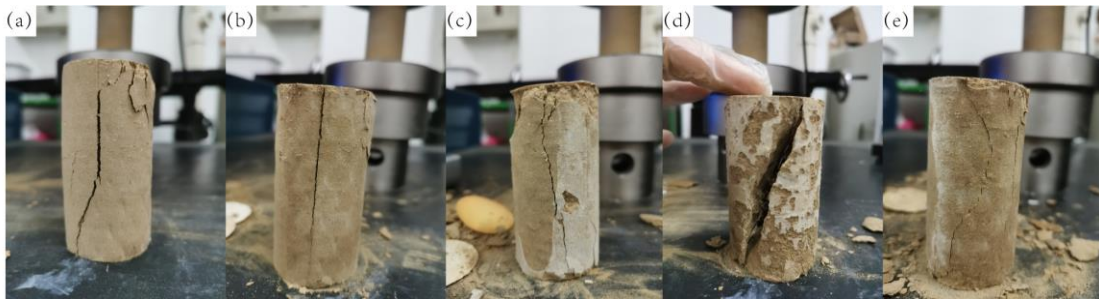

(b) Compression failure diagram of immersed samples in scheme E

**Figure S4.** Compression failure diagram of different samples in scheme E.

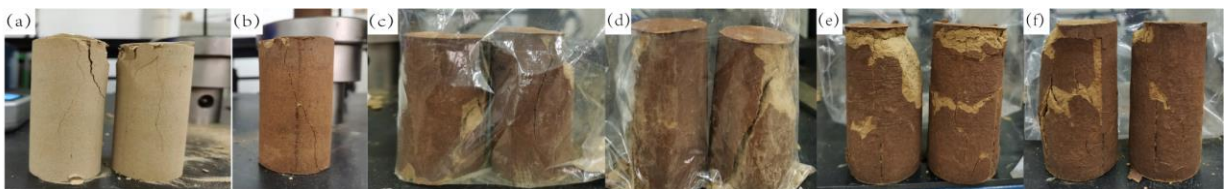

(a) Pressure failure diagram of constant temperature sample of L scheme

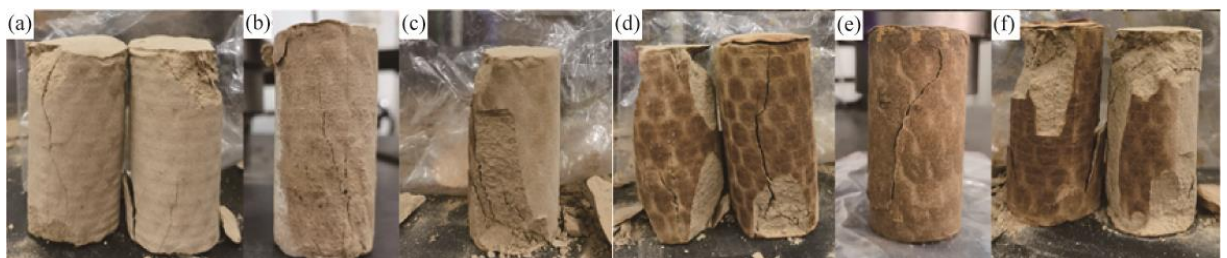

(a) Compression failure diagram of immersed samples in L scheme

**Figure S5.** Compression failure diagram of different samples in L scheme.



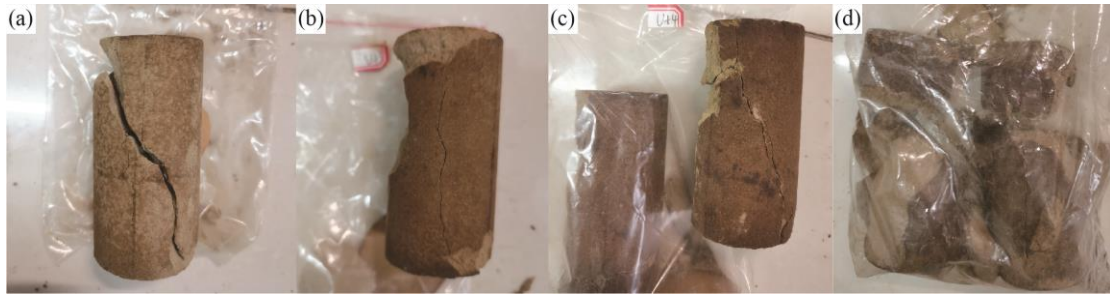

(a) The pressure failure diagram of the constant temperature sample of the E-L scheme

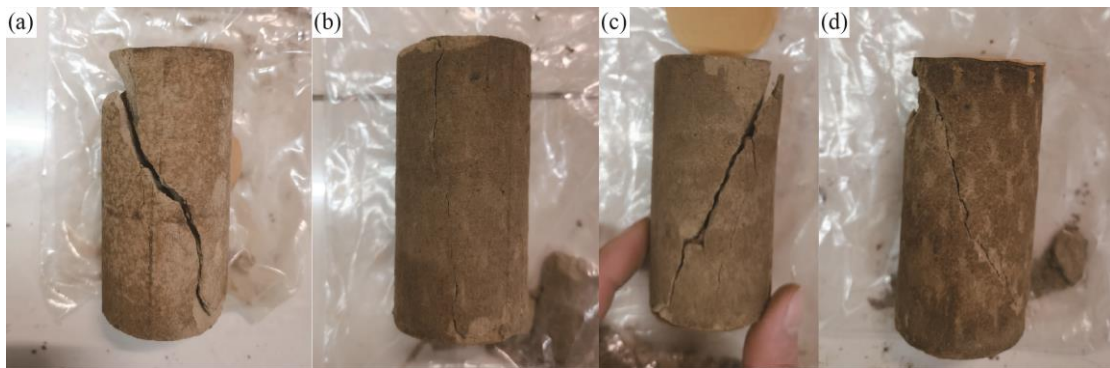

(b) Compression failure diagram of immersed samples in E-L scheme

**Figure S6.** Compression failure diagram of immersed samples in E-L scheme.

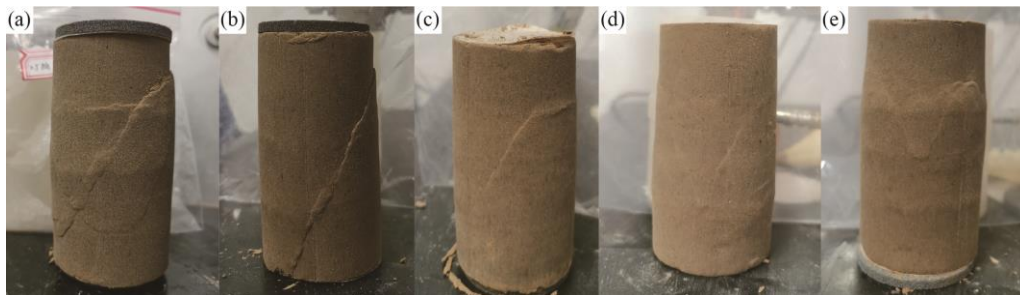

**Figure S7.** The failure diagram of the sample of scheme E under the action of dynamic load.

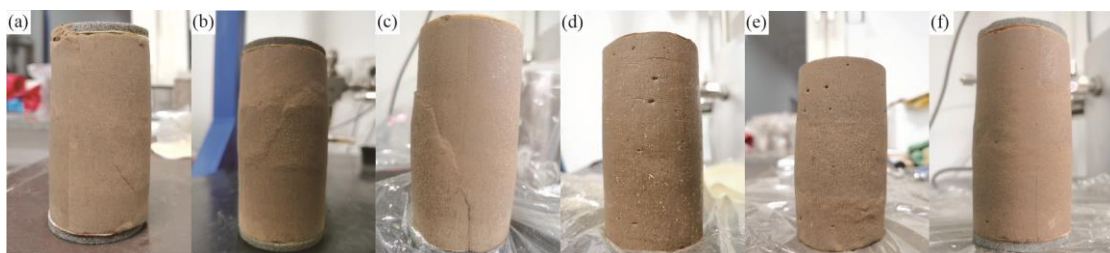

**Figure S8** Failure diagram of L scheme specimen under dynamic load

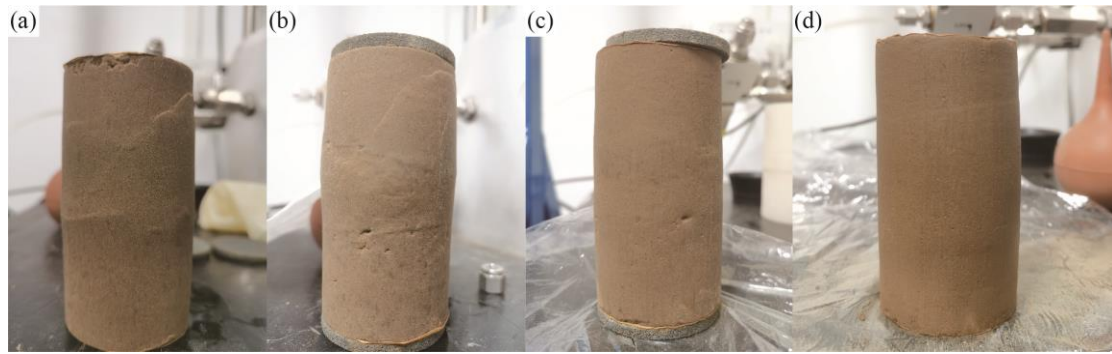

**Figure S9.** Failure diagram of E-L scheme specimen under dynamic load.
